# Supplementary material for: A sensitive sensor based on carbon dots for the determination of Fe3+ and ascorbic acid in foods
Source: Royal Society of Chemistry journal article supplement (doi:10.1039/d3ay02133e), 2024-01-01
Supplement: d3ay02133e1.pdf [file d3ay02133e1.pdf]

# Supplementary Material

## A Sensitive Sensor Based on Carbon Dots for the Determinations of $\text{Fe}^{3+}$ and Ascorbic Acid in Foods

Qian Du<sup>a</sup>, Xiaoyu Zhao<sup>a</sup>, Xiping Mei<sup>a</sup>, Yaqin Zhao<sup>b</sup>, Chuan Dong<sup>c</sup>, Junfen Li<sup>\*a</sup>

a. School of Chemistry and Chemical Engineering, Shanxi University, Taiyuan 030006, China

b. Institute of Molecular Science, Shanxi University, Taiyuan 030006, China

c. Institute of Environmental Science, Shanxi University, Taiyuan 030006, China

---

\* junfenli@sxu.edu.cn

## **Apparatus of characterization**

Ultraviolet-visible (UV–vis) absorption spectra were examined on a UV-2910 UV-vis spectrophotometer (Shimadzu, Japan). The fluorescence spectra were performed on F-4500 fluorescence spectrophotometer (Hitachi, Japan). Transmission electron microscopy (TEM) image was acquired on HT7700 transmission electron microscope (Hitachi, Japan). Fourier transform infrared (FT-IR) spectra was recorded using Frontier FT-IR spectrometer (PerkinElmer, USA). The X-ray photoelectron spectroscopy (XPS) data was obtained with a K-Alpha photoelectron spectrometer (Thermo Fisher, USA). The fluorescent lifetimes were detected using FLS1000 fluorescence spectrometer (Edinburgh, U.K.). The zeta potential was measured on the ZS90 laser particle size analyzer (Malvern Panalytical, U.K.)

**Fig. S1.** Fluorescence intensity of N, S-CDs influenced by (a) different molar ratios of raw materials, (b) different reaction temperatures and (c) different reaction times.

**Fig. S2.** FT-IR spectrum of N, S-CDs.

**Fig. S3.** Fluorescence emission spectra of N, S-CDs (a) in different pH values, (b) at different NaCl concentration, (c) after 35 minutes irradiation under continuous xenon lamp, (d) at different storage time.

**Fig. S4.** The fluorescence intensity of N, S-CDs solution in the presence of various metal ions and biomolecules ( $110 \mu\text{mol L}^{-1}$ ).

**Fig. S5.** (a) Visualization of fluorescence image of N, S-CDs solution at increasing concentration of  $\text{Fe}^{3+}$  ( $0\text{-}100 \mu\text{mol L}^{-1}$ ), (b) Fluorescence recovery of N, S-CDs- $\text{Fe}^{3+}$  solution in the presence of AA ( $0\text{-}60 \mu\text{mol L}^{-1}$ ).

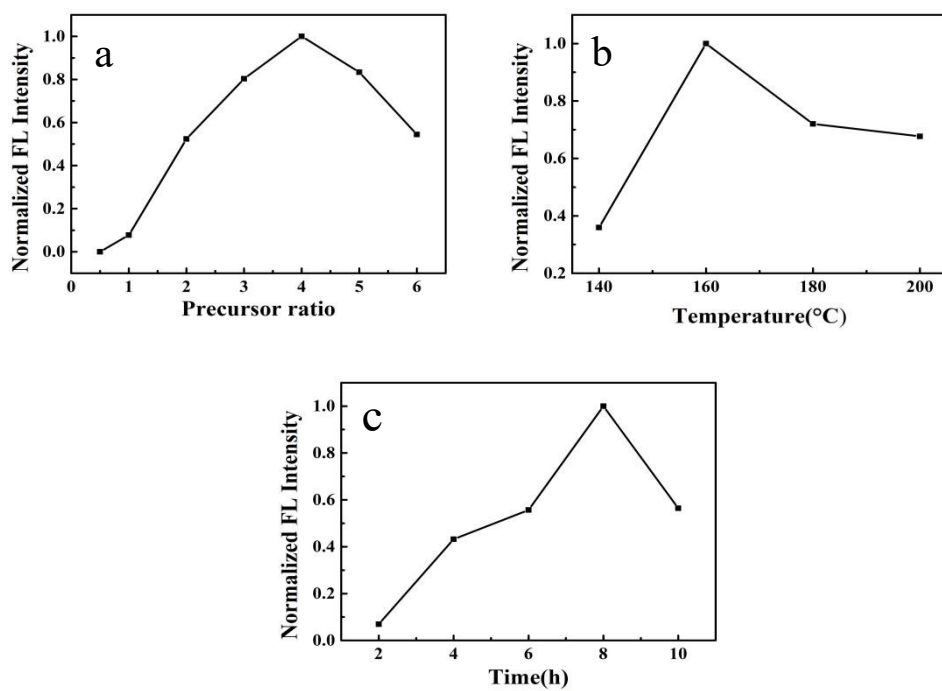

**Fig. S1**

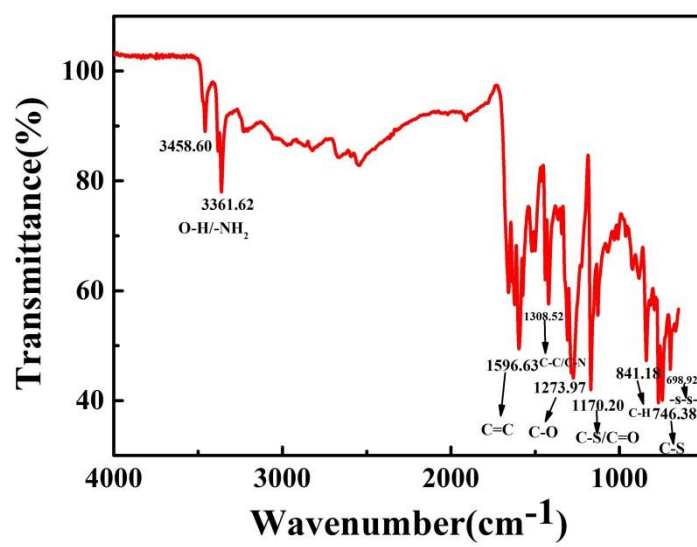

Fig. S2

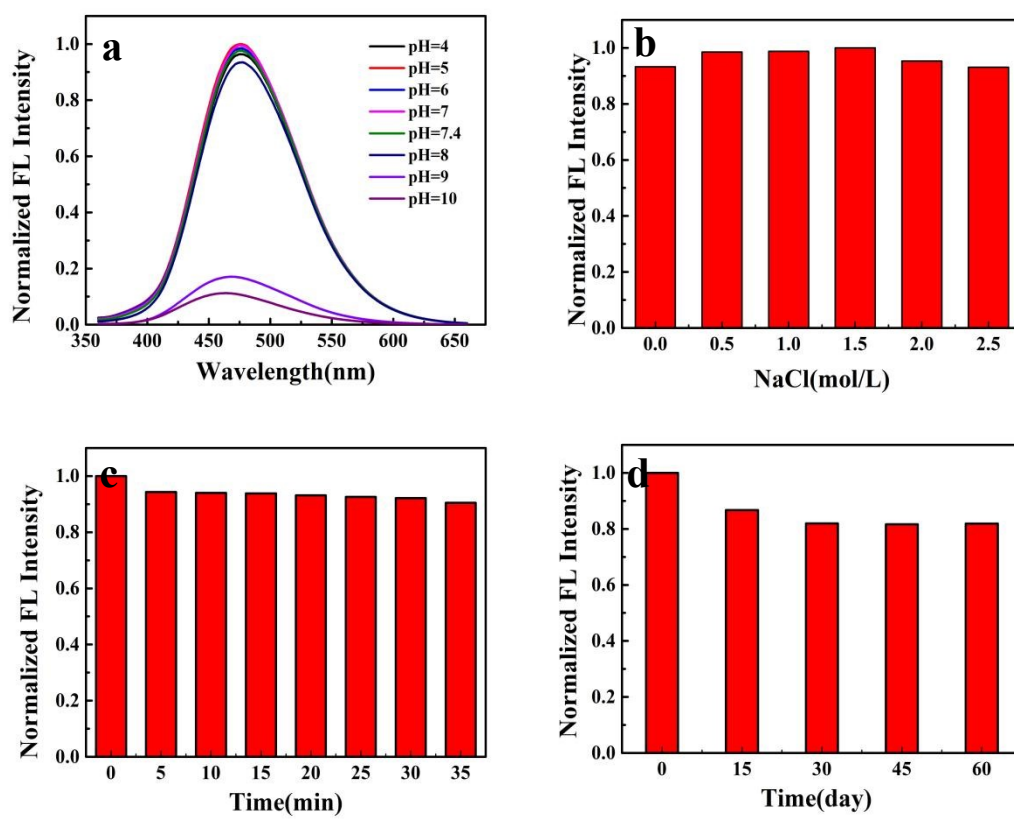

Fig. S3

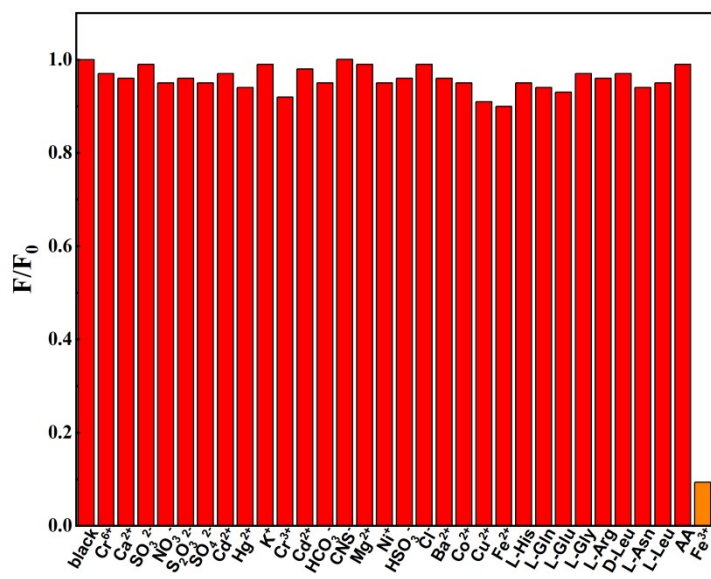

Fig. S4

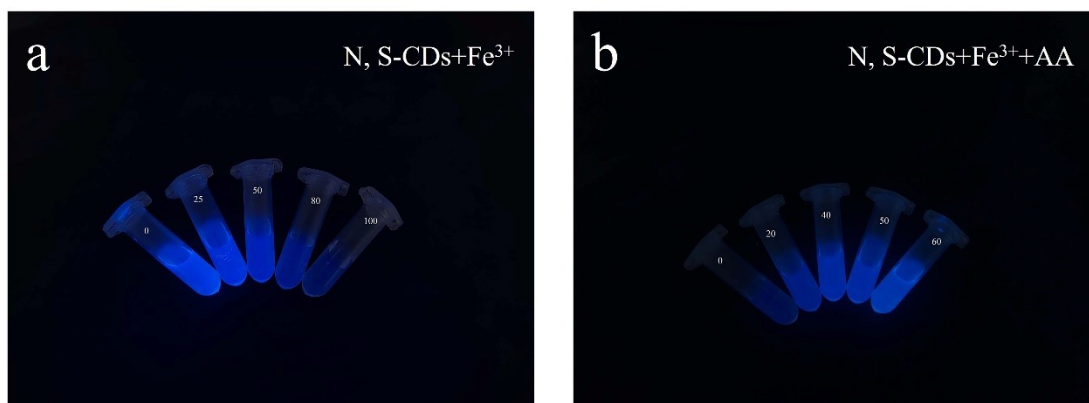

Fig. S5



**Table S1** The results of the titration degree of 2,6-dichloro-indopheno

| No. | Concentration of AA (mg/mL) | The volume of AA standard solution (mL) | Volume of 2,6-dichloro-indopheno used (mL) | Volume of 2,6-dichloro-indopheno used by black(mL) | T (mg/mL)        |         |
|-----|-----------------------------|-----------------------------------------|--------------------------------------------|----------------------------------------------------|------------------|---------|
|     |                             |                                         |                                            |                                                    | Calculated value | Mean    |
| 1   | 1.0000                      | 1.00                                    | 10.32                                      | 0.25                                               | 0.09930          | 0.09891 |
| 2   |                             | 1.00                                    | 10.42                                      |                                                    | 0.09830          |         |
| 3   |                             | 1.00                                    | 10.34                                      |                                                    | 0.09912          |         |
